# Supplementary material
Source: PubMed Central journal article supplement (PMC4156735)
Supplement: 1413726111_pnas.201413726SI.pdf [file 1413726111_pnas.201413726SI.pdf]

# Supporting Information

Au-Yeung et al. 10.1073/pnas.1413726111

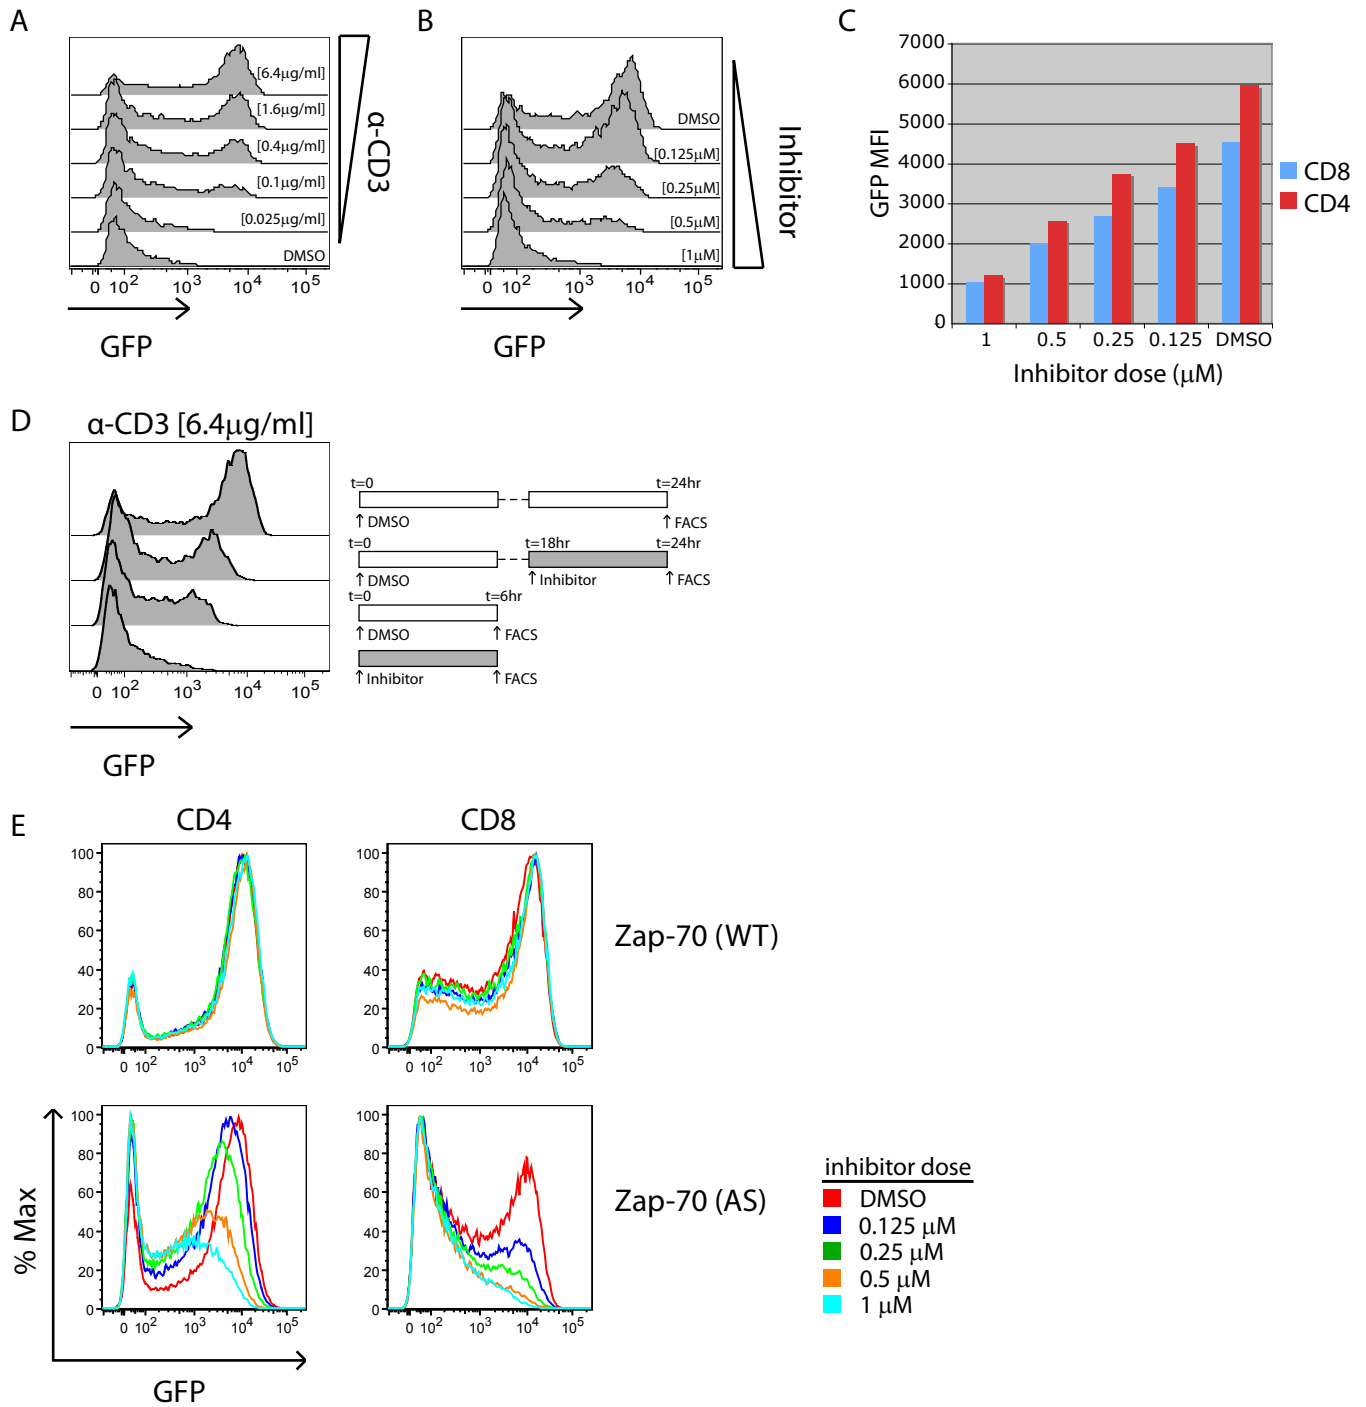

**Fig. S1.** Titration and detection of T-cell receptor (TCR) signaling in CD8<sup>+</sup> T cells. CD8<sup>+</sup> T cells from “analog-sensitive” zeta-chain-associated protein kinase 70 kDa (Zap70) mutant-Nur77-eGFP mice [hereafter referred to as Zap70(AS)-GFP] as in Fig. 1 were stimulated overnight with (A) varying doses of plate-bound anti-CD3 or with (B) a fixed dose of anti-CD3 (6.4  $\mu$ g/ml) and either vehicle (DMSO) or the indicated concentrations of the Zap70(AS) inhibitor HXJ42. (C) Graph shows the mean fluorescence intensity of GFP for the conditions shown in B and in Fig. 1B. (D) CD8<sup>+</sup> Zap70(AS)-GFP T cells were stimulated for varying durations of inhibitor treatment, and GFP induction expression was then assessed by flow cytometry. (E) WT Nur77-GFP (Upper) and Zap70(AS)-GFP (Lower) T cells were stimulated for 20 h with plate-bound anti-CD3 in the presence of varying concentrations of HXJ42. GFP fluorescence was assessed by flow cytometry and the data indicate no off-target effect of HXJ42 on WT CD4<sup>+</sup> or CD8<sup>+</sup> T cells. Data are representative of at least three independent experiments.

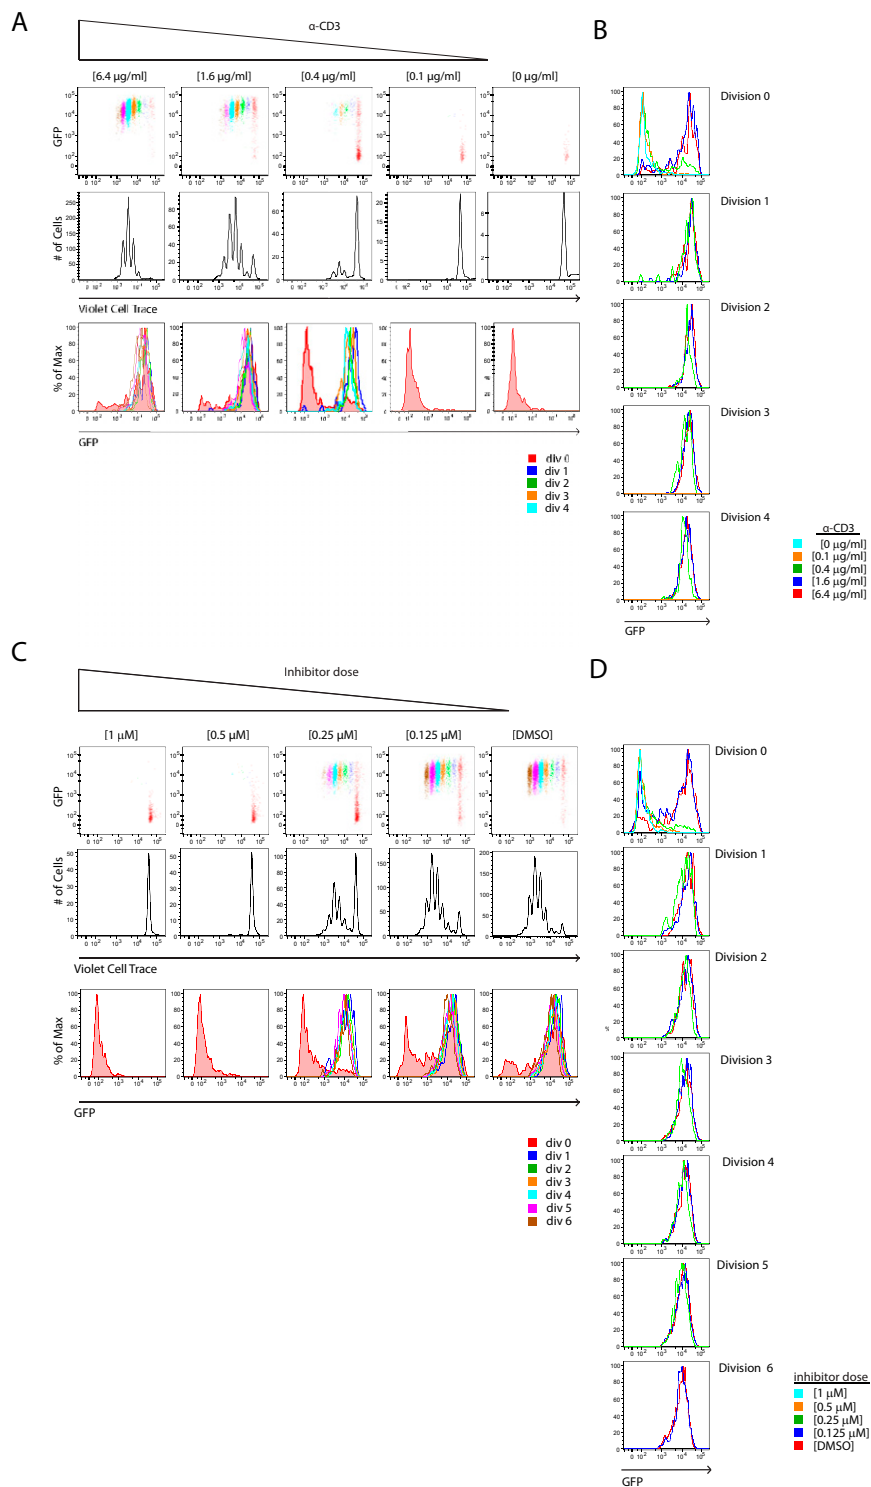

**Fig. S2.** TCR signaling threshold in CD8<sup>+</sup> T cells. Nur77–GFP CD8<sup>+</sup> T cells were loaded with violet cell trace dye and stimulated with (A and B) varying doses of plate-bound anti-CD3 for 4 d, or (C and D) with a fixed concentration of plate-bound anti-CD3 (6.4  $\mu$ g/ml) and the indicated concentrations of HXJ42, as in Fig. 2. Cells were subsequently stained for T-cell markers and (A and C) assessed for dye dilution and GFP fluorescence in combination (Top Row), dye dilution alone (Middle Row), or GFP fluorescence alone (Bottom Row). Individual cell divisions are color-coded (Top and Bottom Rows). (B and D) Histograms show GFP expression by cells in each cell division that have been treated with varying concentrations of anti-CD3 or HXJ42. Data are representative of at least three independent experiments.

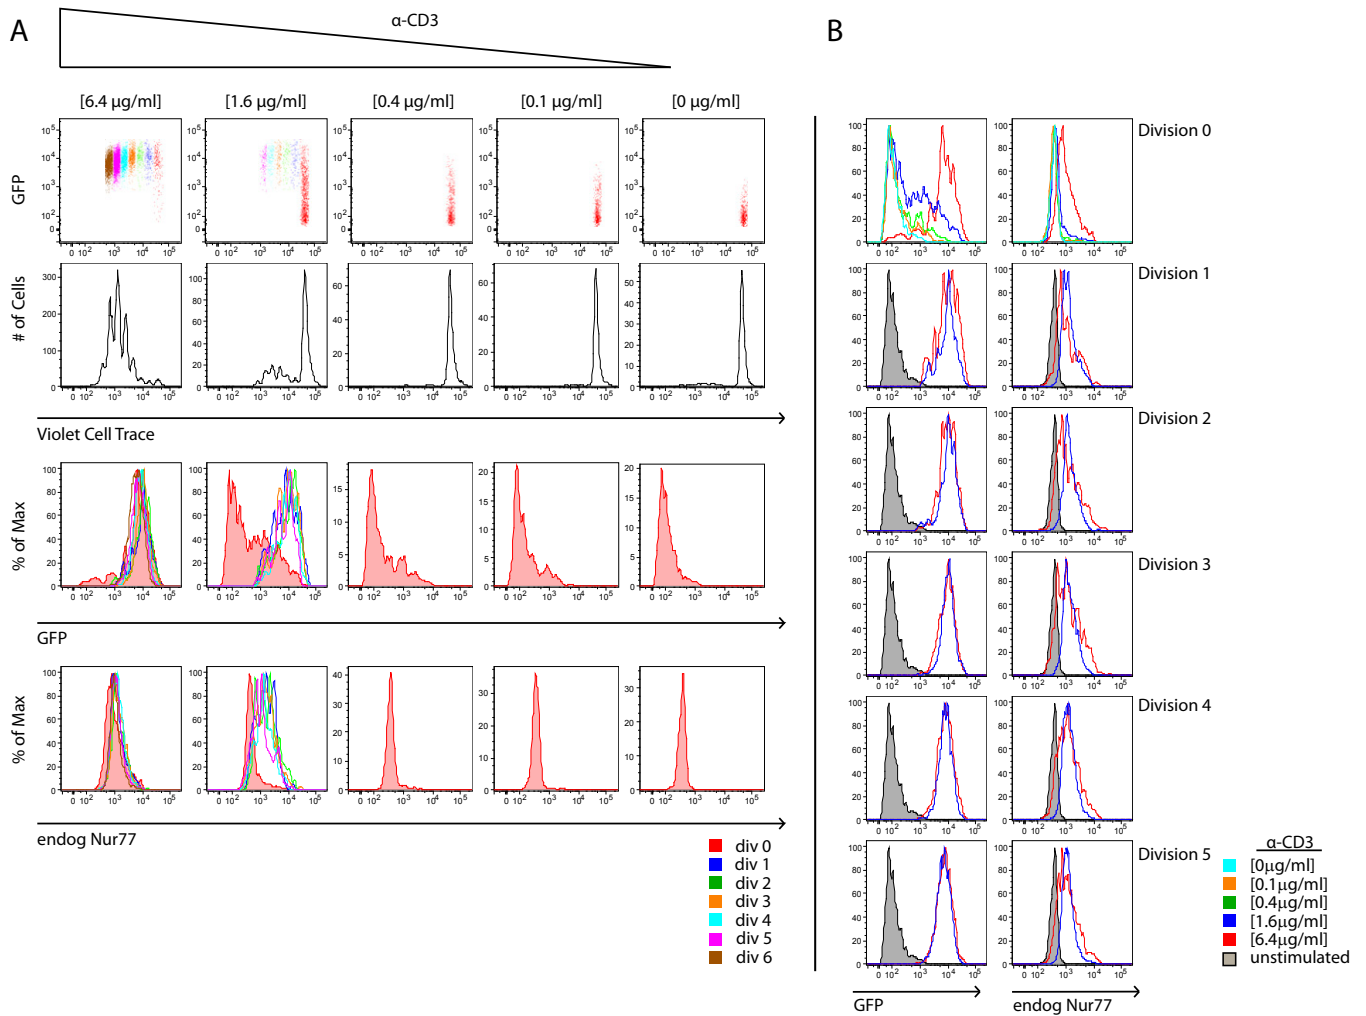

**Fig. S3.** Correlation between endogenous Nur77 expression and GFP reporter in vitro. CD4<sup>+</sup> T cells from Nur77–GFP reporter mice were loaded with violet cell trace dilutional dye and stimulated as described in Fig. 2A. After 4 d, cells were subsequently assessed for (A) GFP fluorescence and dye dilution, GFP alone, or endogenous Nur77 expression by cell division. (B) Histograms show GFP fluorescence (Left) and endogenous Nur77 staining (Right) for cells within the indicated cell division. Data are representative of at least three independent experiments.
